# Supplementary material for: Genome-Wide Identification of Maize G Protein Genes and Regulatory Roles of the ZmGG1 Subfamily in Saline-Alkali Stress Response
Source: Research Square preprint supplement (doi:10.21203/rs.3.rs-7504949/v1), 2025-09-22
Supplement: Supplementary file 1 [file ab252de74b6a3f505a02b61c.xlsx]

## Sheet: TableS1
Table S1 Primers used in this study for RT-qPCR
Primer	Sequence 5'-3'
ZmUBI-2_F	TGGTTGTGGCTTCGTTGGTT
ZmUBI-2_R	GCTGCAGAAGAGTTTTGGGTACA
ZmGG1-RT-F	AATCCATCGCTCGTTCGTC
ZmGG1-RT-R	CCTCTTTGCAGCATCTGGA
ZmGG3-RT-F	CCCACTAATACCGATAAAGAA
ZmGG3-RT-R	CAGAACCATGACACGCATA
ZmGG5-RT-F	CGTGCTGTGAGGGTGAA
ZmGG5-RT-R	GAAGCCAACAGGCATCTAA

## Sheet: TableS2
Expression of the ZmGG1 subfamily genes in the leaves and roots under salt and alkaline stress
	Alkali				Salt
ZmGG1	Zheng58-Leaf	Chang7-2-Leaf	Zheng58-Root	Chang7-2-Root	Zheng58-Leaf	Chang7-2-Leaf	Zheng58-Root	Chang7-2-Root
	0.928623	0.962831	1.05279	0.983247	1.19462	0.961649	0.99165	1.19133
0d	0.957631	0.896479	0.968127	1.15968	1.06304	0.999563	0.864653	1.06643
	1.10438	0.963235	1.17887	1.26351	1.17522	0.859484	1.0587	1.13673
	0.355986	0.851346	0.0736402	0.685183	0.669635	0.794621	0.779644	0.881349
1d	0.449648	0.597982	0.129286	0.59264	0.586436	0.988613	0.854317	1.16863
	0.600454	1.15849	0.0921689	0.586973	0.677368	1.04621	0.945984	0.837372
	0.113583	0.192565	0.0425432	0.0968971	0.234366	0.824623	0.554621	0.761064
3d	0.15674	0.299136	0.0331975	0.0816842	0.197624	0.631164	0.59136	0.796614
	0.11344	0.293015	0.0412863	0.11445	0.232339	0.527881	0.461304	0.756538
ZmGG3
	0.921429	0.873698	0.936802	1.21313	1.04462	2.26133	1.06656	1.33774
0d	1.39142	0.957246	1.01313	1.33975	1.07795	2.17184	1.03643	1.46423
	0.806005	0.849793	0.949857	1.18338	1.10912	2.2638	0.752004	1.16252
	1.65039	0.761574	1.46593	0.818614	0.98451	1.59443	1.16862	1.36832
1d	0.957951	0.778906	1.53477	0.954397	0.975361	1.77996	0.981306	1.13773
	0.50939	0.758416	1.46005	0.891343	0.995057	1.6803	1.24552	1.3376
	0.662468	0.454319	1.08136	0.478414	0.737953	0.492216	0.831328	0.924613
3d	0.736895	0.436951	0.967922	0.467931	0.734361	0.597265	0.831306	0.939913
	0.769444	0.49453	1.10788	0.476658	0.692908	0.60305	0.814257	0.938317
ZmGG5
	1.68138	2.26395	0.957314	1.32862	1.9544	0.82116	1.06165	1.24826
0d	1.93503	2.18765	0.898364	1.44751	1.9645	0.954963	1.21852	1.26126
	1.79625	2.26608	0.945301	1.20012	1.9757	0.900841	0.994834	1.21496
	0.848561	1.16136	0.679632	0.817632	0.95003	0.924863	2.33117	3.88125
1d	0.893198	1.27679	0.711635	0.93014	1.13669	0.928896	2.08132	3.45125
	0.814408	1.42727	0.603726	0.895758	1.16378	0.910016	2.31156	3.66394
	0.599727	0.311395	0.568632	0.170317	0.881303	0.974238	1.66793	0.981246
3d	0.714059	0.36138	0.62463	0.224621	0.798896	0.961933	1.54432	0.731126
	0.622414	0.315635	0.567421	0.187629	0.904863	1.01958	1.69512	0.821225

## Sheet: TableS3
	Sequence variations in the ZmGG1 subfamily between Zheng58 and Chang7-2
ZmGG1	0	1	2	3	4	5	6	7	8	9	10	11	12	13	14	15	16	17	18	19	20	21	22	23	24	25	26	27	28	29	30	31	32	33	34	35	36	37	38	39	40	41	42	43	44	45	46	47	48
Chang7-2	A	G	G	C	C	G	T	T	C	T	C	C	G	T	A	G	G	C	G	G	T	C	T	T	T	T	G	C	G	T	C	T	T	C	G	T	T	C	C	C	C	G	C	T	A	C	C	G	G
Zheng58	N	N	G	C	T	A	C	T	T	G	T	T	G	C	C	G	A	T	C	G	G	T	C	C	C	C	A	T	A	C	A	A	C	T	A	T	C	G	T	T	T	A	T	C	G	T	T	G	T
	64	65	66	67	68	69	70	71	72	73	74	75	76	77	78	79	80	81	82	83	84	85	86	87	88	89	90	91	92	93	94	95	96	97	98	99	100	101	102	103	104	105	106	107	108	109	110	111	112
	T	G	C	G	G	G	T	T	A	T	G	T	C	C	A	G	T	T	C	T	T	T	C	C	N	C	G	A	T	T	A	A	C	G	C	G	G	A	T	C	C	G	G	G	C	T	G	A	T
	C	A	T	A	A	G	C	T	C	G	G	C	T	T	G	G	A	C	C	T	A	C	C	T	G	N	N	A	T	C	G	A	T	T	T	G	A	G	C	T	C	G	G	G	C	T	G	A	T
	128	129	130	131	132	133	134	135	136	137	138	139	140	141	142	143	144	145	146	147	148	149	150	151	152	153	154	155	156	157	158	159	160	161	162	163	164	165	166	167	168	169	170	171	172	173	174	175	176
	G	C	T	G	C	A	C	C	C	G	G	G	G	A	A	G	T	T	C	C	A	C	T	A	T	C	G	T	G	C	T	G	A	A	A	T	A	C	C	G	C	T	A	C	C	C	G	G	A
	N	N	N	A	C	C	C	C	N	N	N	G	A	A	T	A	T	T	C	C	A	N	C	A	T	C	G	T	A	C	T	G	G	A	N	N	T	C	G	G	C	N	N	N	N	N	N	A	A
	192	193	194	195	196	197	198	199	200	201	202	203	204	205	206	207	208	209	210	211	212	213	214	215	216	217	218	219	220	221	222	223	224	225	226	227	228	229	230	231	232	233	234	235	236	237	238	239	240
	T	A	G	T	T	A	G	C	G	C	C	C	T	T	G	A	G	A	G	G	T	N	A	G	G	G	C	C	C	G	T	G	G	G	T	C	G	G	A	C	A	A	T	A	G	G	T	G	T
	G	A	G	N	T	N	G	N	C	A	T	C	T	C	G	N	A	A	G	G	N	T	N	G	G	C	T	G	C	G	G	A	A	G	T	G	C	T	A	C	A	G	N	A	N	N	N	N	N
ZmGG3	0	1	2	3	4	5	6	7	8	9	10	11	12	13	14	15	16	17	18	19	20	21	22	23	24	25	26	27	28	29	30	31	32	33	34	35	36	37	38	39	40	41	42	43	44	45	46	47	48
Chang7-2	G	C	T	N	N	N	N	N	R	N	N	T	C	G	C	A	N	C	G	C	N	N	N	N	N	N	N	N	N	N	N	N	N	N	N	N	N	N	N	N	N	N	N	N	C	T	C	G	C
Zheng58	R	Y	T	G	N	A	N	N	G	N	G	T	C	N	C	A	N	N	N	C	N	N	N	C	N	T	G	N	N	N	N	G	G	A	C	G	N	N	N	N	C	G	N	N	N	N	N	A	C
	64	65	66	67	68	69	70	71	72	73	74	75	76	77	78	79	80	81	82	83	84	85	86	87	88	89	90	91	92	93	94	95	96	97	98	99	100	101	102	103	104	105	106	107	108	109	110	111	112
	N	N	N	N	N	N	N	N	N	N	N	N	N	N	N	N	N	N	N	N	N	N	N	N	N	N	N	N	N	N	N	N	N	N	N	N	N	N	N	C	A	C	C	C	A	G	T	C	C
	N	C	N	N	N	N	C	G	N	N	N	N	N	N	N	N	N	N	N	N	N	N	N	N	N	N	N	N	N	N	N	N	N	N	N	N	N	N	N	C	G	C	C	C	G	G	T	C	C
	128	129	130	131	132	133	134	135	136	137	138	139	140	141	142	143	144	145	146	147	148	149	150	151	152	153	154	155	156	157	158	159	160	161	162	163	164	165	166	167	168	169	170	171	172	173	174	175	176
	A	C	T	G	T	A	T	T	T	G	A	G	T	G	C	G	C	T	C	A	G	T	T	T	T	C	T	G	C	C	G	T	G	G	C	A	A	C	T	A	G	G	T	G	A	G	A	C	G
	C	C	C	G	T	A	G	T	T	G	A	G	T	G	C	G	C	T	C	A	G	T	T	T	T	C	T	G	C	C	G	T	G	G	C	A	A	C	T	A	G	G	T	G	A	G	A	C	G
	192	193	194	195	196	197	198	199	200	201	202	203	204	205	206	207	208	209	210	211	212	213	214	215	216	217	218	219	220	221	222	223	224	225	226	227	228	229	230	231	232	233	234	235	236	237	238	239	240
	A	C	G	T	A	T	C	C	G	T	A	G	N	G	A	C	T	T	A	A	G	C	C	A	A	G	C	G	A	T	G	G	G	T	C	T	C	C	A	T	T	G	G	A	G	A	C	T	C
	G	T	N	C	A	A	G	N	G	T	A	C	A	G	C	C	T	A	G	T	A	C	C	A	A	G	T	C	A	C	A	A	A	T	C	C	C	T	A	C	C	G	G	A	G	A	T	T	C
	256	257	258	259	260	261	262	263	264	265	266	267	268	269	270	271	272	273	274	275	276	277	278	279	280	281	282	283	284	285	286	287	288	289	290	291	292	293	294	295	296	297	298	299	300	301	302	303	304
	A	A	A	A	G	G	T	N	N	N	A	C	A	N	G	C	T	G	C	N	G	N	C	A	C	A	A	A	G	A	A	A	G	A	C	A	A	A	A	G	T	C	A	C	T	G	G	T	A
	G	A	G	G	A	G	N	N	N	N	A	C	A	N	G	T	T	N	C	N	A	N	N	N	C	A	G	A	A	A	A	A	G	A	C	G	A	A	C	T	T	T	A	C	A	G	N	T	A
	320	321	322	323
	G	T	C	G
	A	N	C	G
ZmGG5	0	1	2	3	4	5	6	7	8	9	10	11	12	13	14	15	16	17	18	19	20	21	22	23	24	25	26	27	28	29	30	31	32	33	34	35	36	37	38	39	40	41	42	43	44	45	46	47	48
Chang7-2	G	G	N	G	G	G	C	T	C	T	A	A	N	G	A	T	G	A	A	G	G	C	C	G	C	G	C	G	C	C	C	C	C	G	G	G	C	N	G	C	G	A	C	T	G	C	T	C	T
Zheng58	G	G	G	G	G	G	C	T	C	T	A	A	G	G	A	T	G	A	A	G	A	C	C	G	C	G	C	G	C	T	C	C	C	G	G	G	C	C	T	C	T	A	C	T	C	C	C	C	A
	64	65	66	67	68	69	70	71	72	73	74	75	76	77	78	79	80	81	82	83	84	85	86	87	88	89	90	91	92	93	94	95	96	97	98	99	100	101	102	103	104	105	106	107	108	109	110	111	112
	N	A	N	T	G	N	N	N	T	G	A	N	N	N	N	N	N	T	T	G	C	A	C	G	C	A	T	T	A	C	A	C	A	C	G	A	C	T	C	A	G	G	N	C	G	A	T	C	T
	G	A	G	T	G	C	G	C	T	A	A	C	C	C	T	C	N	T	T	G	C	A	C	G	C	A	T	T	A	C	A	C	A	T	G	G	C	T	T	A	G	C	G	G	C	A	C	T	T
	128	129	130	131	132	133	134	135	136	137	138	139	140	141	142	143	144	145	146	147	148	149	150	151	152	153	154	155	156	157	158	159	160	161	162	163	164	165	166	167	168	169	170	171	172	173	174	175	176
	C	G	C	T	T	G	G	A	T	G	A	A	T	T	A	A	T	C	C	A	G	T	A	C	A	T	C	C	T	A	A	C	G	A	T	G	T	T	G	C	T	G	T	G	G	T	G	A	T
	T	G	C	G	A	A	A	G	C	G	C	A	T	T	A	C	T	C	G	G	G	T	A	C	A	T	C	C	T	A	A	C	G	A	T	G	T	T	G	C	T	G	T	G	G	T	G	A	T
	192	193	194	195	196	197	198	199	200	201	202	203	204	205	206	207	208	209	210	211	212	213	214	215	216	217	218	219	220	221	222	223	224	225	226	227	228	229	230	231	232	233	234	235	236	237	238	239	240
	N	N	N	N	N	N	N	N	N	A	G	T	C	T	T	A	T	G	T	C	T	T	G	C	T	G	T	C	G	T	T	T	G	C	T	C	G	G	C	G	G	C	C	G	A	T	C	A	A
	N	N	N	N	N	N	N	N	T	A	G	T	C	T	T	A	T	G	T	C	N	T	G	C	T	G	T	C	G	T	T	T	G	C	T	C	G	G	C	G	G	C	C	G	A	T	C	A	A
	256	257	258	259	260	261	262	263	264	265	266	267	268	269	270	271	272	273	274	275	276	277	278	279	280	281	282	283	284	285	286	287	288	289	290	291	292	293	294	295	296	297	298
	N	N	N	N	N	N	N	N	N	N	N	N	N	N	N	N	N	N	N	N	N	N	C	G	R	N	N	N	N	C	N	A	N	N	N	N	N	N	N	N	N	N	N
	N	N	N	N	N	N	N	N	N	N	N	N	N	N	N	N	N	N	N	N	N	N	C	G	N	N	N	N	N	N	N	N	N	N	N	N	N	N	N	N	N	N	C
[truncated: 15 more columns]

## Sheet: TableS4
Identifiers of maize genes and their corresponding protein accessions in the PPI network.
Gene ID	Protein
ZmGA1	A0A1D6JQD6
ZmXLG1	A0A1D6KEZ7
ZmXLG3	Pco134033
ZmXLG2	K7UCM3_MAIZE
ZmGB1	GB1
ZmGG2	A0A1D6KXG0
ZmGG4	A0A1D6H046
ZmGG1	D1GC39_MAIZE
ZmGG3	A0A1D6ER37
ZmGG5	Pco089444
Zm00001d047447	K7VZB3_MAIZE
Zm00001d014903	PLC
Zm00001d014906	A0A1D6GXI7
Zm00001d028746	A0A1D6JZ59
Zm00001d006787	A0A1D6F0Q0
Zm00001d007229	A0A1D6F512
Zm00001d015692	A0A1D6H388
Zm00001d015693	A0A1D6H390
Zm00001d042733	A0A1D6N6H3
Zm00001d026551	A0A1D6JHG9
Zm00001d011693	A0A1D6G321
Zm00001d026553	A0A1D6JHH2
Zm00001d051337	Cl23489_1b
Zm00001d011694	A0A1D6G322
Zm00001d017460	A0A1D6HEZ2
Zm00001d011692	C0P5P9_MAIZE
Zm00001d043695	B6T7G0_MAIZE
Zm00001d046861	A0A1D6P5A3
Zm00001d024788	Si707004g09
Zm00001d039045	A0A1D6MD20
Zm00001d025998	B6SI96_MAIZE
Zm00001d003320	A0A1D6E8J2
Zm00001d039367	A0A1D6MFX1
Zm00001d051012	FEA2
Zm00001d031685	A0A1D6KKN6
Zm00001d009688	A0A1Q1BU40
Zm00001d007783	A0A1D6F8V4
Zm00001d027850	A0A1D6JQ46
Zm00001d050148	K7TVG9_MAIZE
Zm00001d036230	C0P427_MAIZE
Zm00001d037110	A0A1D6LUJ1
Zm00001d029606	A0A1D6K690
Zm00001d021916	A0A1D6IHV2
Zm00001d035148	A0A1D6LEQ1
Zm00001d051463	A0A1D6Q715
Zm00001d003753	A0A1D6EBE6
Zm00001d016500	A0A1D6H8A0
Zm00001d021090	A0A1D6I8A8
Zm00001d039488	B6TFK0_MAIZE
Zm00001d027619	Pco104637
Zm00001d014083	B4FW64_MAIZE
Zm00001d006576	A0A1D6EY13
Zm00001d019757	A0A1D6I096
Zm00001d029983	A0A1D6K8T3
Zm00001d016308	A0A1D6H6P2
Zm00001d047077	K7WC35_MAIZE
Zm00001d009016	B4FHQ3_MAIZE
Zm00001d039265	B4FAY6_MAIZE
Zm00001d006539	C0P5G0_MAIZE
Zm00001d031595	A0A1D6KJT3
