# Supplementary figures and images for: Genome-Wide Identification of Maize G Protein Genes and Regulatory Roles of the ZmGG1 Subfamily in Saline-Alkali Stress Response
Source: Research Square preprint supplement (doi:10.21203/rs.3.rs-7504949/v1), 2025-09-22

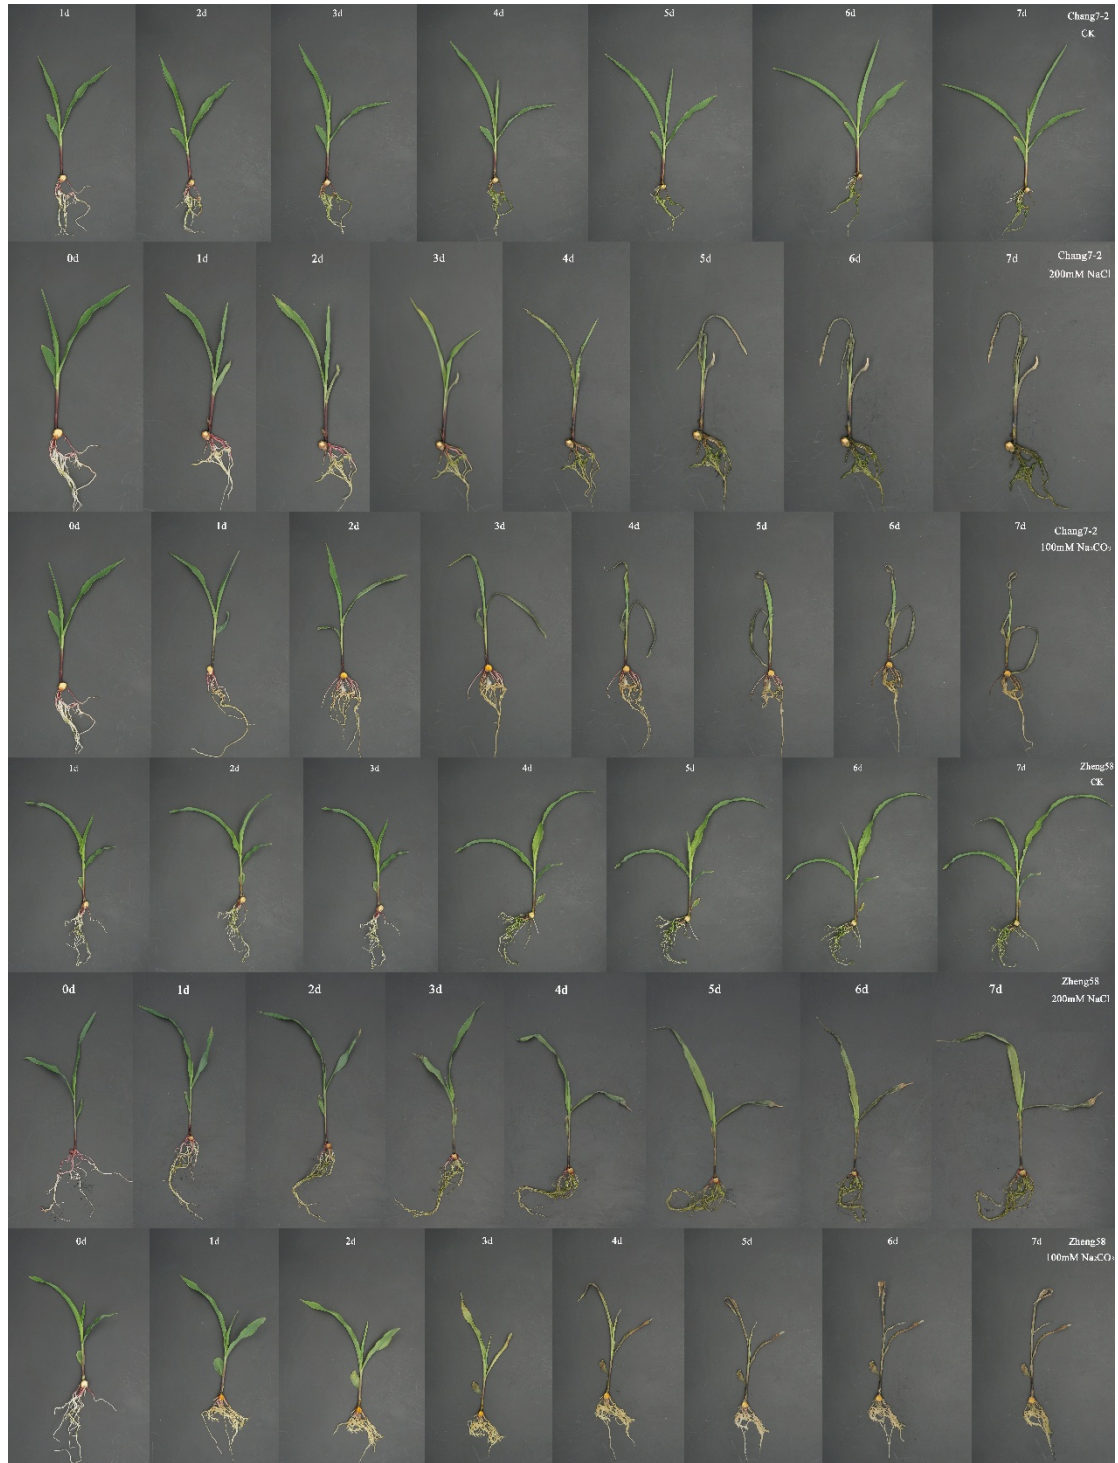

FigS1. Treatment of Zheng58 and Chang7-2 with 200 mM NaCl and 100 mM Na<sub>2</sub>CO<sub>3</sub>

Supplement: Supplementary file 1 [file 1234d5b9b3a4f318a3b1c042.pdf]
